# Supplementary material for: Zwitterionic-surfactant modified LAPONITE®s for removal of ions (Cs+, Sr2+ and Co2+) from aqueous solutions as a sustainable recovery method for radionuclides from aqueous wastes
Source: Royal Society of Chemistry journal article supplement (doi:10.1039/c9gc02243k), 2019-01-01
Supplement: c9gc02243k1.pdf [file c9gc02243k1.pdf]

## Zwitterionic-surfactant modified Laponites® for removal of ions (Cs<sup>+</sup>; Sr<sup>2+</sup> and Co<sup>2+</sup>) from aqueous solution as a sustainable recovery of radionuclides from aqueous wastes.

T. Thiebault<sup>1,2,3\*</sup>, J. Brendlé<sup>1,2</sup>, G. Augé<sup>4</sup>, L. Limousy<sup>1,2</sup>

<sup>1</sup>Université de Haute-Alsace, IS2M, CNRS, UMR7361, 3b rue Alfred Werner, F68100 Mulhouse, France

<sup>2</sup>Université de Strasbourg, France

<sup>3</sup>EPHE, PSL University, UMR7619 METIS (EPHE, SU, CNRS), F75005 Paris, France

<sup>4</sup>ONET Technologies, 36 Boulevard de l'Océan, CS 20280, 13258 Marseille Cedex 09, France

To whom correspondence should be addressed. E-mail: [thomas.thiebault@ephe.psl.eu](mailto:thomas.thiebault@ephe.psl.eu). Phone: +33(0)144275997

### Supplementary data

Table S1: General informations on the selected surfactant, Cocamidopropyl Betaine

|             |                                                                                      |
|-------------|--------------------------------------------------------------------------------------|
| Structure   | 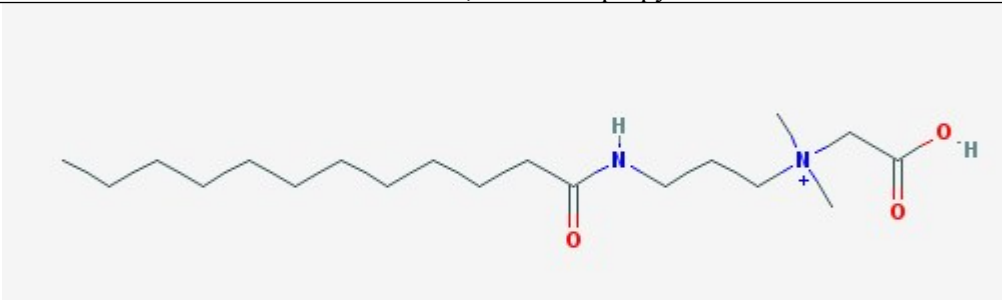 |
| Formula     | C <sub>19</sub> H <sub>38</sub> N <sub>2</sub> O <sub>3</sub>                        |
| CAS-Number  | 86438-79-1                                                                           |
| Mass weight | 342.52 g.mol <sup>-1</sup>                                                           |

Table S2: Quantitative information derived from TG curves of sorbents, with Global the whole adsorbed amount of CB and Intercalation the intercalated adsorbed amount of CB expressed according to the CEC of LAP

|               | Water Content % | OM Content % | Intercalation % | Surface % | Global CEC | Intercalation CEC |
|---------------|-----------------|--------------|-----------------|-----------|------------|-------------------|
| LAP           | 13.7            |              |                 |           |            |                   |
| LAP-CB-0.5CEC | 9.9             | 4.9          | 4.6             | 0.3       | 0.21       | 0.20              |
| LAP-CB-1CEC   | 6.9             | 9.4          | 8.5             | 0.9       | 0.39       | 0.36              |
| LAP-CB-2CEC   | 4.5             | 20.5         | 12.1            | 8.4       | 0.84       | 0.49              |
| LAP-CB-4CEC   | 4.0             | 27.1         | 12.3            | 14.8      | 1.10       | 0.50              |

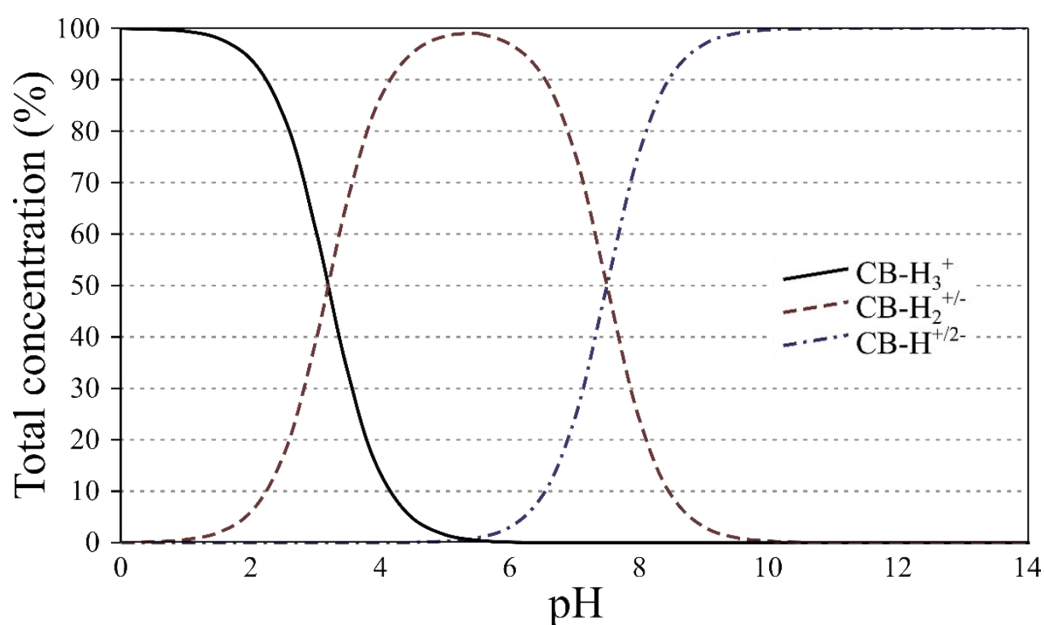

Figure S1: Distribution of CB species as a function of pH

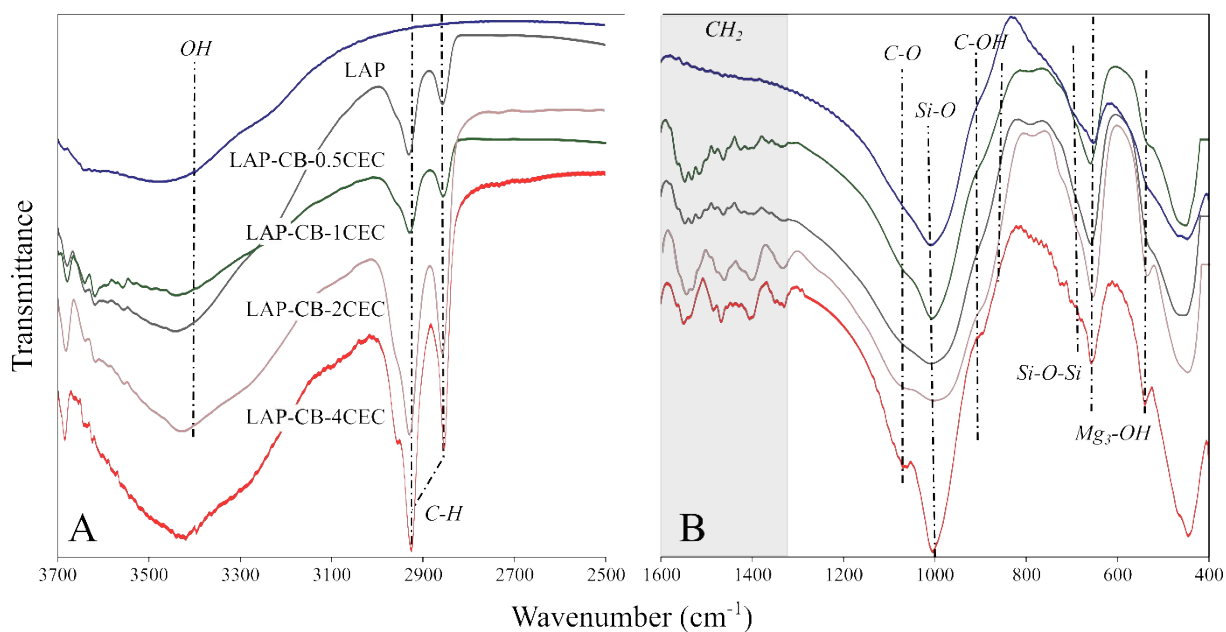

Figure S2: FTIR spectra of LAP and LAP-CBs for wavenumbers range between 400 and 1600  $\text{cm}^{-1}$  (B) and between 2500 and 3700  $\text{cm}^{-1}$

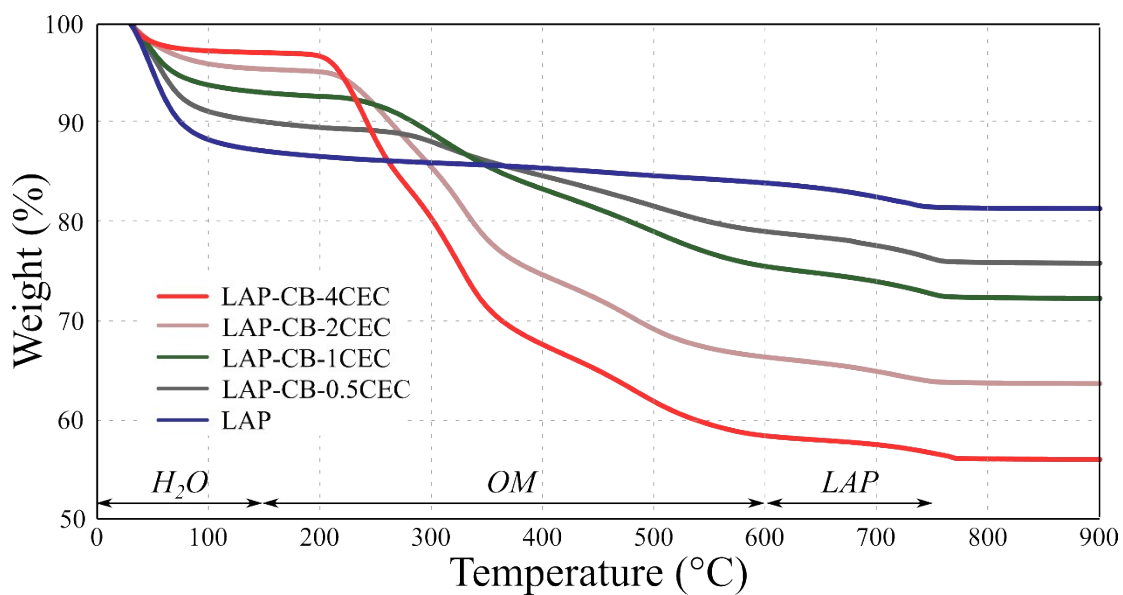

Figure S3: TG curves of LAP and LAP-CBs, the theoretical decomposition domains are specified at the bottom of the figure

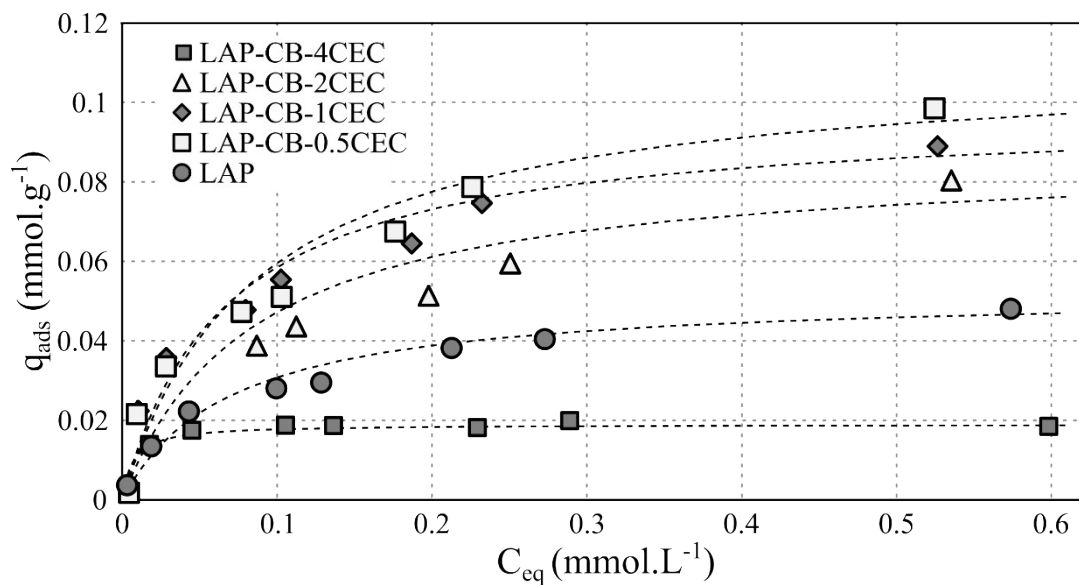

Figure S4: Competitive solution sorption isotherms of  $Cs^+$  onto LAP and LAP-CBs, dashed dark lines represents the Langmuir fits

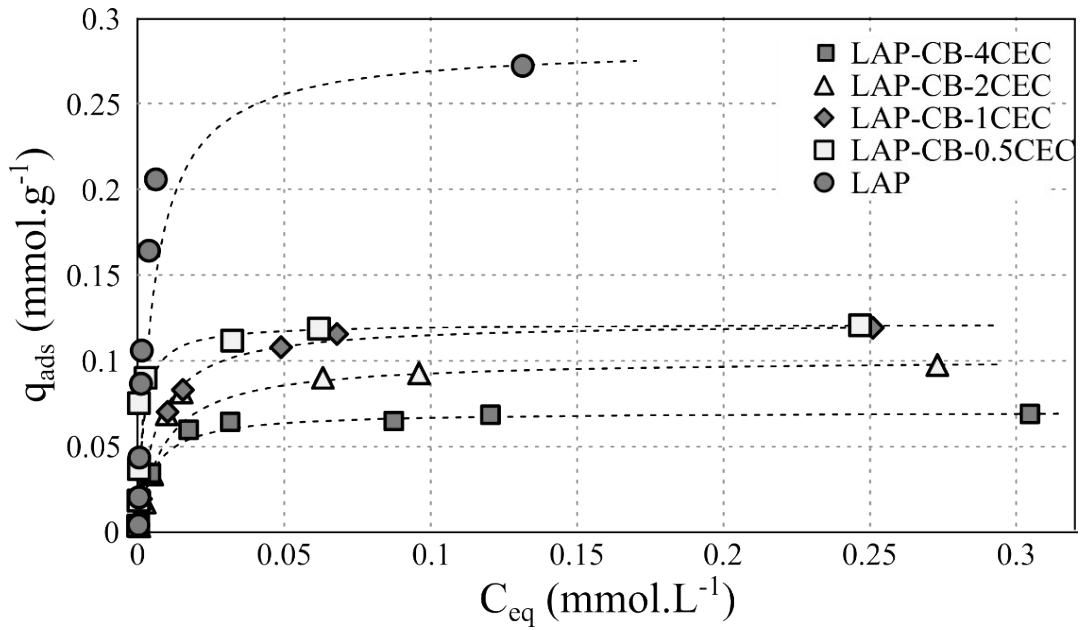

Figure S5: Competitive solution sorption isotherms of  $\text{Sr}^{2+}$  onto LAP and LAP-CBs, dashed dark lines represents the Langmuir fits

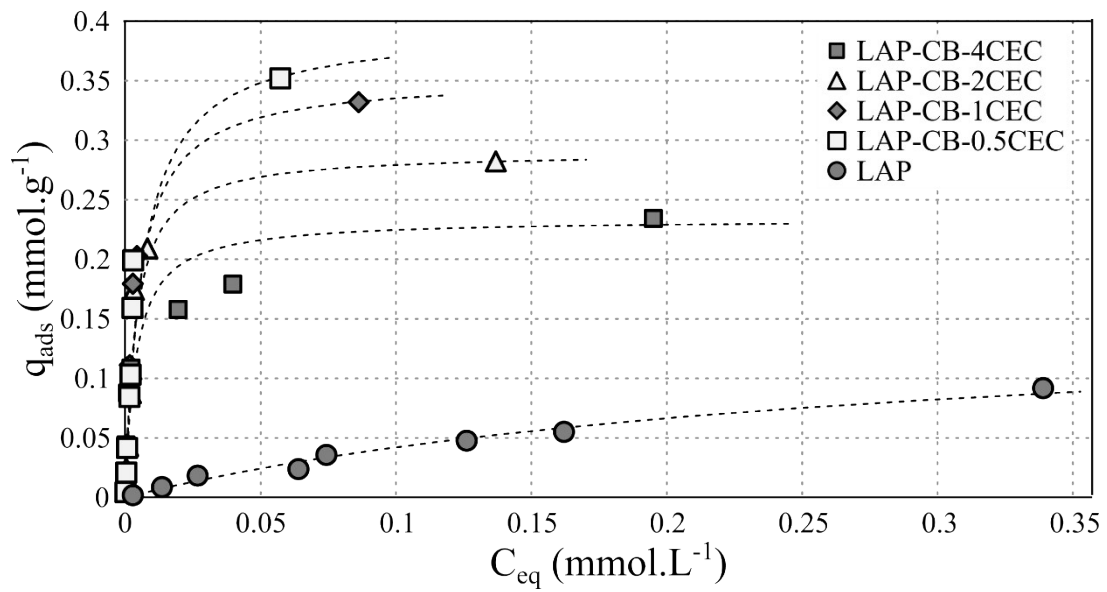

Figure S6: Competitive solution sorption isotherms of  $\text{Co}^{2+}$  onto LAP and LAP-CBs, dashed dark lines represents the Langmuir fits
